# Supplementary material for: Phenotype-Specific Outcome and Treatment Response in Heart Failure with Preserved Ejection Fraction with Comorbid Hypertension and Diabetes: A 12-Month Multicentered Prospective Cohort Study
Source: MDPI journal article supplement (doi:10.3390/jpm13081218), 2023-07-31
Supplement: s1 [file s1]

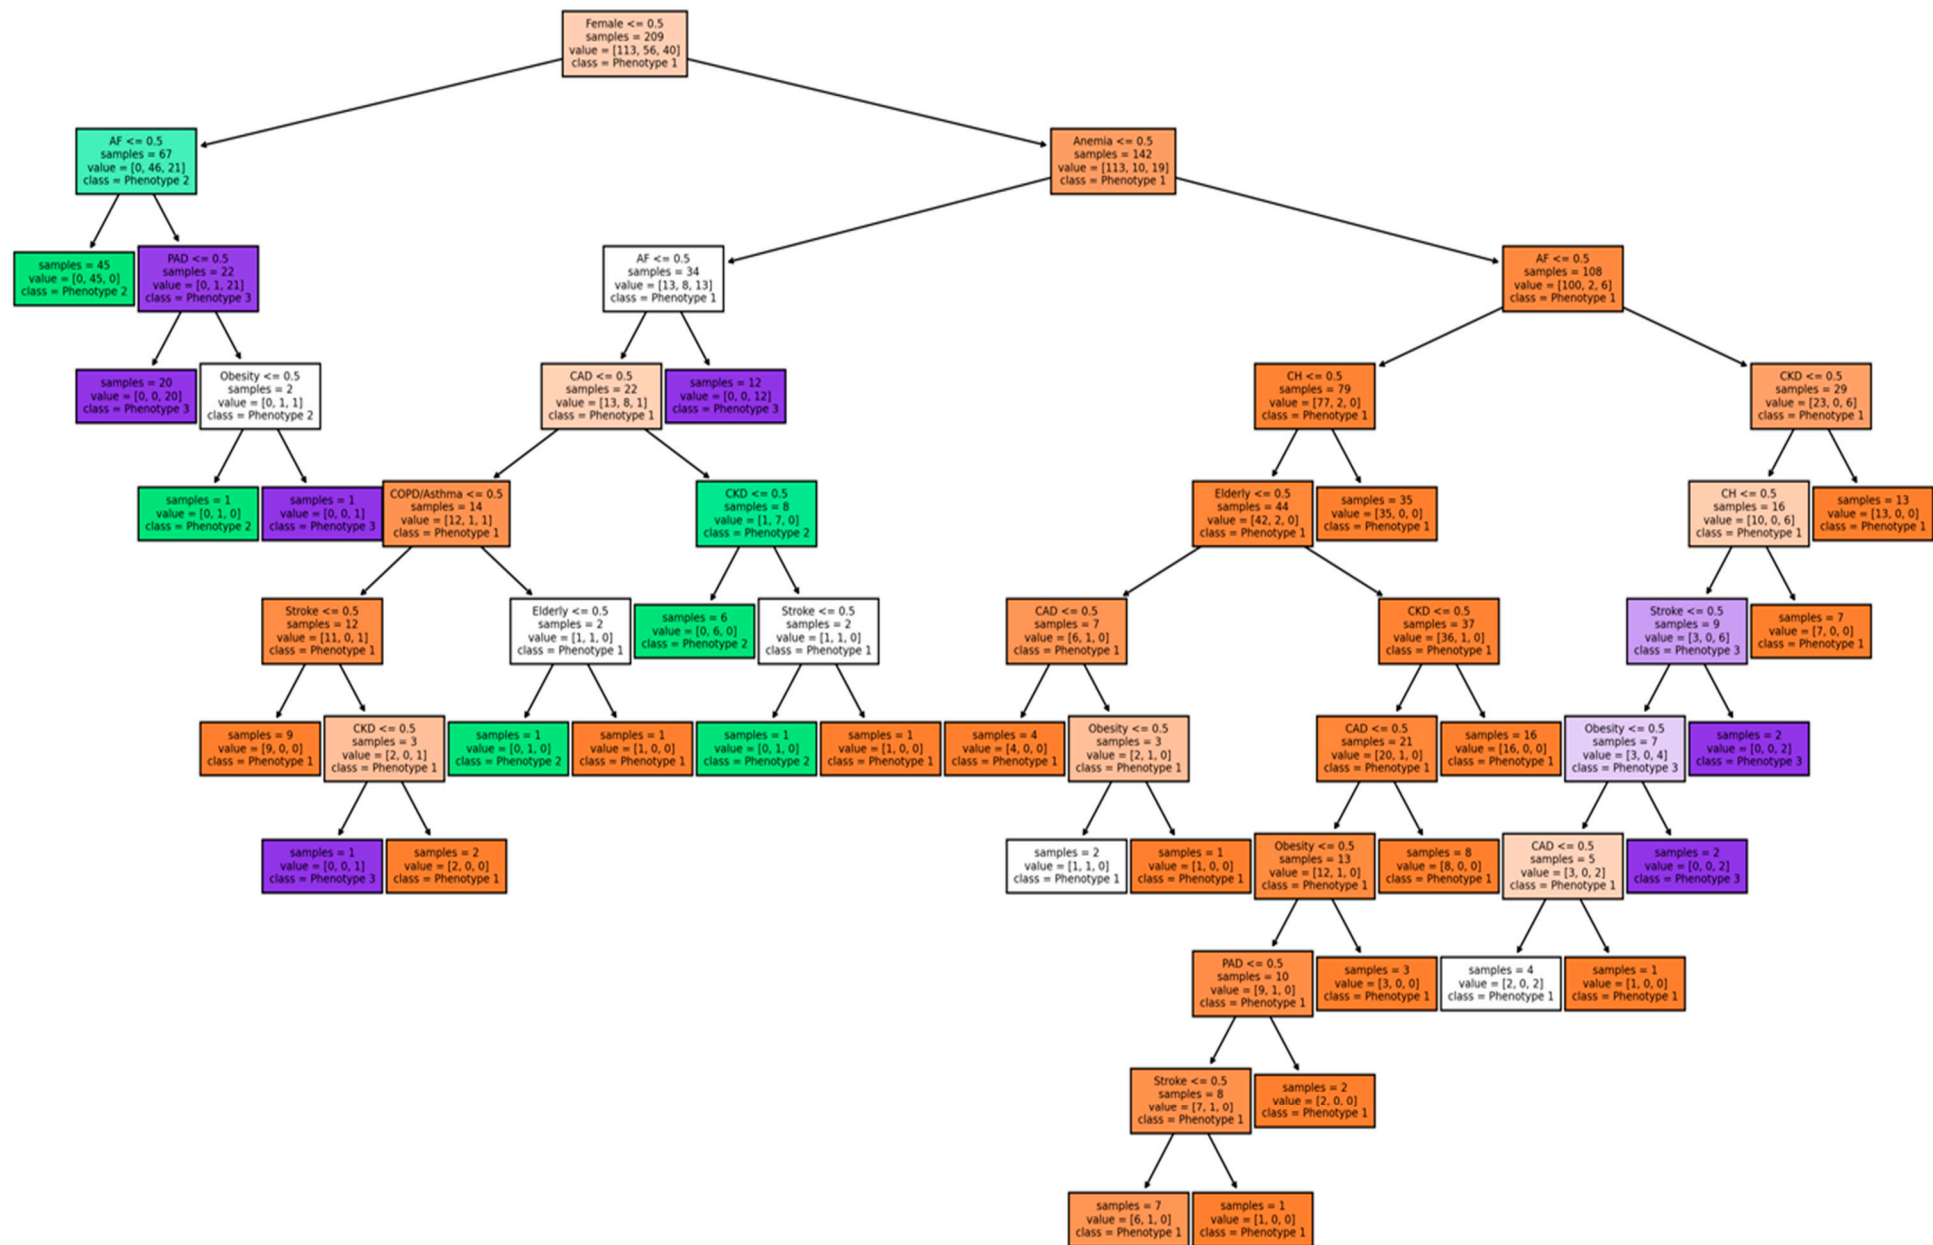

**Figure S2. Decision tree for phenotype assignment.**

Samples and value indicate the number of data points and phenotypes at each node. Since all features are categorical data, " $\leq 0.5$ " indicates the absence of features.

Abbreviation: AF: Atrial Fibrillation, CAD: Coronary artery disease, CH: Concentric hypertrophy, CKD: Chronic kidney disease, COPD: Chronic obstructive pulmonary disease, PAD: Peripheral artery disease
