# Supplementary material for: Phenotype-Specific Outcome and Treatment Response in Heart Failure with Preserved Ejection Fraction with Comorbid Hypertension and Diabetes: A 12-Month Multicentered Prospective Cohort Study
Source: MDPI journal article supplement (doi:10.3390/jpm13081218), 2023-07-31
Supplement: s1 [file s1]

**Table S1.** Geometry classification of Left Ventricle on Echocardiogram

| Left Ventricular Mass Index                                        | Relative Wall Thickness | Relative Wall Thickness |
|--------------------------------------------------------------------|-------------------------|-------------------------|
|                                                                    | $\leq 0.42$             | $> 0.42$                |
| $< 115 \text{g/m}^2$ (male) or $< 95 \text{g/m}^2$ (female)        | Normal                  | Concentric Remodelling  |
| $\geq 115 \text{g/m}^2$ ( male) or $\geq 95 \text{g/m}^2$ (female) | Eccentric Hypertrophy   | Concentric Hypertrophy  |
