# Supplementary material for: Phenotype-Specific Outcome and Treatment Response in Heart Failure with Preserved Ejection Fraction with Comorbid Hypertension and Diabetes: A 12-Month Multicentered Prospective Cohort Study
Source: MDPI journal article supplement (doi:10.3390/jpm13081218), 2023-07-31
Supplement: s1 [file s1]

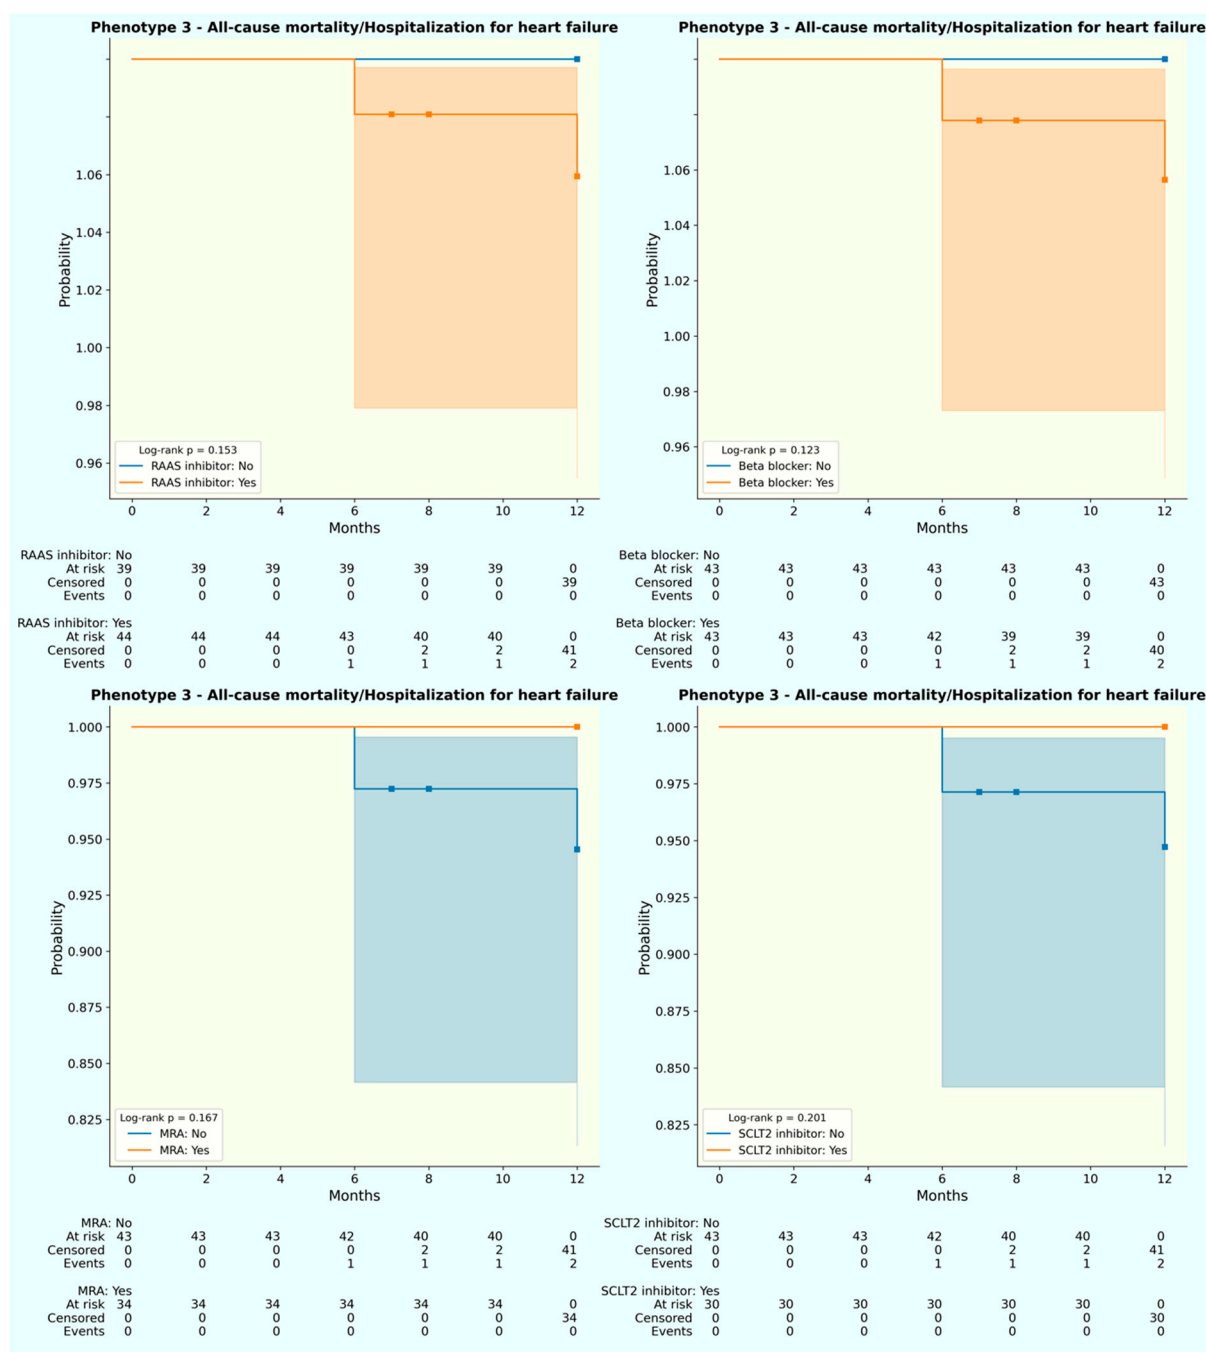

**Figure S1. Weighted Kaplan-Meier curve for 12-month primary outcome by treatment status of phenotype 3. (Upper Left) RAAS inhibitor; (Upper Right) Beta blocker; (Lower Left) MRA; (Lower Right) SGLT2 inhibitor.**

Blue: without medication; Orange: with medication
