# Supplementary material for: Phenotype-Specific Outcome and Treatment Response in Heart Failure with Preserved Ejection Fraction with Comorbid Hypertension and Diabetes: A 12-Month Multicentered Prospective Cohort Study
Source: MDPI journal article supplement (doi:10.3390/jpm13081218), 2023-07-31
Supplement: s1 [file s1]

**Table S2.** Fit Statistic Information on LCA analysis

| <b>Model</b> | <b>BIC</b> | <b>AIC</b> | <b>Maximum log-likelihood</b> |
|--------------|------------|------------|-------------------------------|
| 2-class      | 2423.71    | 2358.14    | -1160.07                      |
| 3-class      | 2446.46    | 2346.38    | -1144.19                      |
| 4-class      | 2485.23    | 2350.64    | -1136.32                      |
| 5-class      | 2525.30    | 2356.20    | -1129.01                      |
| 6-class      | 2550.57    | 2346.96    | -1114.48                      |
